# Supplementary material for: Next Generation Sequencing in Newborn Screening in the United Kingdom National Health Service
Source: Int J Neonatal Screen. 2019 Nov 5;5(4):40. doi: 10.3390/ijns5040040 (PMC6914376; doi:10.3390/ijns5040040)
Supplement: Supplementary file 1 [file IJNS-05-00040-s001.zip › SupplementaryDataS2_WG_IAD48658.bed]

track type=bedDetail ionVersion=4.0 name="WG_IAD48658_2_Designed" description="Amplicon_Insert_WG_IAD48658_2"
chr1	34967210	34967380	108_SP_1.84843	0	+	.	GENE_ID=rs4652841;Pool=1
chr1	76190017	76190257	ACADM_1.45922	0	+	.	GENE_ID=ACADM;Pool=2
chr1	76190204	76190429	ACADM_1.3629	0	+	.	GENE_ID=ACADM;Pool=1
chr1	76190283	76190523	ACADM_1.40831	0	+	.	GENE_ID=ACADM;Pool=2
chr1	76194000	76194178	ACADM_2.7886	0	+	.	GENE_ID=ACADM;Pool=1
chr1	76198242	76198445	ACADM_3.89782	0	+	.	GENE_ID=ACADM;Pool=2
chr1	76198420	76198634	ACADM_3.43009	0	+	.	GENE_ID=ACADM;Pool=1
chr1	76198730	76198935	ACADM_5.2319	0	+	.	GENE_ID=ACADM;Pool=2
chr1	76199194	76199410	ACADM_6.141533	0	+	.	GENE_ID=ACADM;Pool=1
chr1	76200382	76200601	ACADM_7.111034	0	+	.	GENE_ID=ACADM;Pool=2
chr1	76205623	76205834	ACADM_8.87689	0	+	.	GENE_ID=ACADM;Pool=1
chr1	76211473	76211685	ACADM_9.37034	0	+	.	GENE_ID=ACADM;Pool=2
chr1	76215026	76215236	ACADM_10.107691	0	+	.	GENE_ID=ACADM;Pool=1
chr1	76215122	76215325	ACADM_10.168719	0	+	.	GENE_ID=ACADM;Pool=2
chr1	76216040	76216247	ACADM_11.61582	0	+	.	GENE_ID=ACADM;Pool=1
chr1	76226744	76226967	ACADM_12.114214	0	+	.	GENE_ID=ACADM;Pool=2
chr1	76226904	76227070	ACADM_12.265463	0	+	.	GENE_ID=ACADM;Pool=1
chr1	76228266	76228488	ACADM_13.1.49217	0	+	.	GENE_ID=ACADM;Pool=2
chr1	76228383	76228591	ACADM_13.1.10195	0	+	.	GENE_ID=ACADM;Pool=1
chr1	76228535	76228751	ACADM_13.1.490	0	+	.	GENE_ID=ACADM;Pool=2
chr1	76228642	76228845	ACADM_13.1.226642	0	+	.	GENE_ID=ACADM;Pool=1
chr1	76228802	76228929	ACADM_13.1.220544	0	+	.	GENE_ID=ACADM;Pool=2
chr1	76228908	76229122	ACADM_13.1.5659	0	+	.	GENE_ID=ACADM;Pool=1
chr1	76229100	76229202	ACADM_13.1.186112	0	+	.	GENE_ID=ACADM;Pool=2
chr1	76229173	76229385	ACADM_13.1.155075	0	+	.	GENE_ID=ACADM;Pool=1
chr1	165465125	165465296	108_SP_2.38479	0	+	.	GENE_ID=rs4657449;Pool=2
chr1	176525185	176525335	108_SP_3.15001	0	+	.	GENE_ID=rs2294654;Pool=1
chr1	204866301	204866468	108_SP_4.89940	0	+	.	GENE_ID=rs2759281;Pool=2
chr2	17853361	17853520	108_SP_52.41482	0	+	.	GENE_ID=rs4578856;Pool=1
chr2	17901349	17901522	108_SP_53.13358	0	+	.	GENE_ID=rs1834619;Pool=2
chr2	17908018	17908189	108_SP_54.19013	0	+	.	GENE_ID=rs7556886;Pool=1
chr2	28493591	28493766	108_SP_55.35407	0	+	.	GENE_ID=rs4666050;Pool=2
chr2	28549247	28549429	108_SP_56.82742	0	+	.	GENE_ID=rs876251;Pool=1
chr2	104715193	104715366	108_SP_57.35405	0	+	.	GENE_ID=rs11896903;Pool=2
chr2	109500910	109501086	108_SP_58.183479	0	+	.	GENE_ID=rs1478516;Pool=1
chr2	109579640	109579817	108_SP_59.54512	0	+	.	GENE_ID=rs260690;Pool=2
chr2	177519334	177519490	108_SP_60.35182	0	+	.	GENE_ID=rs6433602;Pool=1
chr2	240295534	240295710	108_SP_61.111956	0	+	.	GENE_ID=rs2176046;Pool=2
chr3	71434418	71434572	108_SP_66.45272	0	+	.	GENE_ID=rs831084;Pool=1
chr3	71480440	71480615	108_SP_67.142437	0	+	.	GENE_ID=rs9809818;Pool=2
chr3	71487477	71487650	108_SP_68.130025	0	+	.	GENE_ID=rs9837708;Pool=1
chr3	96929416	96929535	108_SP_69.163556	0	+	.	GENE_ID=rs9289324;Pool=2
chr3	114012234	114012406	108_SP_70.120895	0	+	.	GENE_ID=rs1039524;Pool=1
chr3	139056529	139056702	108_SP_71.135945	0	+	.	GENE_ID=rs10935320;Pool=2
chr3	194804811	194804954	108_SP_72.44815	0	+	.	GENE_ID=rs7627506;Pool=1
chr4	38263790	38263964	108_SP_73.41615	0	+	.	GENE_ID=rs973787;Pool=1
chr4	42074579	42074735	108_SP_74.63142	0	+	.	GENE_ID=rs4619931;Pool=2
chr4	61832096	61832265	108_SP_75.18379	0	+	.	GENE_ID=rs754422;Pool=1
chr5	71260655	71260828	108_SP_76.29132	0	+	.	GENE_ID=rs1217824;Pool=1
chr5	81571745	81571905	108_SP_77.10455	0	+	.	GENE_ID=rs226201;Pool=2
chr5	81617916	81618080	108_SP_78.95358	0	+	.	GENE_ID=rs224804;Pool=1
chr5	112563564	112563738	108_SP_79.216690	0	+	.	GENE_ID=rs7717906;Pool=2
chr5	123541203	123541349	108_SP_80.78385	0	+	.	GENE_ID=rs1013496;Pool=1
chr5	123545984	123546155	108_SP_81.74552	0	+	.	GENE_ID=rs922556;Pool=2
chr6	41460190	41460360	108_SP_82.19618	0	+	.	GENE_ID=rs3800282;Pool=1
chr6	44551368	44551542	108_SP_83.89477	0	+	.	GENE_ID=rs3997520;Pool=2
chr6	69767478	69767633	108_SP_84.54241	0	+	.	GENE_ID=rs9446089;Pool=1
chr6	69844727	69844797	108_SP_85.21634	0	+	.	GENE_ID=rs1482326;Pool=2
chr6	69900086	69900219	108_SP_86.9577	0	+	.	GENE_ID=rs779484;Pool=1
chr6	143429326	143429496	108_SP_87.58627	0	+	.	GENE_ID=rs3789783;Pool=2
chr7	117119526	117119749	CFTR-c.1-500_1.14227	0	+	.	GENE_ID=CFTR-c.1-500;Pool=1
chr7	117119705	117119931	CFTR-c.1-500_1.43331	0	+	.	GENE_ID=CFTR-c.1-500;Pool=2
chr7	117119915	117120077	CFTR-c.1-500_1.50152	0	+	.	GENE_ID=CFTR-c.1-500,CFTR;Pool=1
chr7	117120064	117120269	CFTR-c.1-500_1.18317	0	+	.	GENE_ID=CFTR-c.1-500,CFTR;Pool=2
chr7	117144293	117144512	CFTR_2.77874	0	+	.	GENE_ID=CFTR;Pool=1
chr7	117149074	117149297	CFTR_3.78321	0	+	.	GENE_ID=CFTR;Pool=2
chr7	117170903	117171122	CFTR_4.49022	0	+	.	GENE_ID=CFTR;Pool=1
chr7	117170948	117171173	CFTR_4.57995	0	+	.	GENE_ID=CFTR;Pool=2
chr7	117174156	117174378	CFTR_5.27402	0	+	.	GENE_ID=CFTR;Pool=1
chr7	117174340	117174557	CFTR_5.10902	0	+	.	GENE_ID=CFTR;Pool=2
chr7	117175287	117175509	CFTR_6.49819	0	+	.	GENE_ID=CFTR;Pool=1
chr7	117176516	117176724	CFTR_7.133192	0	+	.	GENE_ID=CFTR;Pool=2
chr7	117176691	117176917	CFTR_7.54338	0	+	.	GENE_ID=CFTR;Pool=1
chr7	117180087	117180319	CFTR_8.134374	0	+	.	GENE_ID=CFTR;Pool=2
chr7	117180314	117180533	CFTR_8.2710	0	+	.	GENE_ID=CFTR;Pool=1
chr7	117182007	117182215	CFTR_9.81300	0	+	.	GENE_ID=CFTR;Pool=2
chr7	117188665	117188875	CFTR_10.37806	0	+	.	GENE_ID=CFTR;Pool=1
chr7	117188875	117189106	CFTR_10.90651	0	+	.	GENE_ID=CFTR;Pool=2
chr7	117199508	117199720	CFTR_11.258956	0	+	.	GENE_ID=CFTR;Pool=1
chr7	117218291	117218464	SP_1.17576	0	+	.	GENE_ID=CFTR-c.1585-912;Pool=2
chr7	117227687	117227908	CFTR_12.92794	0	+	.	GENE_ID=CFTR;Pool=1
chr7	117229475	117229627	SP_2.10445	0	+	.	GENE_ID=CFTR-c.1680-886;Pool=2
chr7	117230329	117230549	CFTR_13.154456	0	+	.	GENE_ID=CFTR;Pool=1
chr7	117231787	117232006	CFTR_14.398778	0	+	.	GENE_ID=CFTR;Pool=2
chr7	117232001	117232219	CFTR_14.455105	0	+	.	GENE_ID=CFTR;Pool=1
chr7	117232173	117232395	CFTR_14.6188	0	+	.	GENE_ID=CFTR;Pool=2
chr7	117232257	117232479	CFTR_14.118394	0	+	.	GENE_ID=CFTR;Pool=1
chr7	117232440	117232661	CFTR_14.477555	0	+	.	GENE_ID=CFTR;Pool=2
chr7	117232505	117232724	CFTR_14.187410	0	+	.	GENE_ID=CFTR;Pool=1
chr7	117234938	117235148	CFTR_15.21831	0	+	.	GENE_ID=CFTR;Pool=2
chr7	117242795	117243017	CFTR_16.23079	0	+	.	GENE_ID=CFTR;Pool=1
chr7	117243461	117243684	CFTR_17.268561	0	+	.	GENE_ID=CFTR;Pool=2
chr7	117243671	117243897	CFTR_17.77241	0	+	.	GENE_ID=CFTR;Pool=1
chr7	117246718	117246903	CFTR_18.17776	0	+	.	GENE_ID=CFTR;Pool=2
chr7	117250519	117250731	CFTR_19.38881	0	+	.	GENE_ID=CFTR;Pool=1
chr7	117251451	117251676	CFTR_20.138551	0	+	.	GENE_ID=CFTR;Pool=2
chr7	117251645	117251864	CFTR_20.80898	0	+	.	GENE_ID=CFTR;Pool=1
chr7	117251736	117251910	CFTR_20.67372	0	+	.	GENE_ID=CFTR;Pool=2
chr7	117254608	117254829	CFTR_21.136771	0	+	.	GENE_ID=CFTR;Pool=1
chr7	117267467	117267689	CFTR_22.170835	0	+	.	GENE_ID=CFTR;Pool=2
chr7	117267593	117267827	CFTR_22.274518	0	+	.	GENE_ID=CFTR;Pool=1
chr7	117267780	117268000	CFTR_22.129582	0	+	.	GENE_ID=CFTR;Pool=2
chr7	117282476	117282692	CFTR_23.101279	0	+	.	GENE_ID=CFTR;Pool=1
chr7	117288339	117288509	SP_3.44946	0	+	.	GENE_ID=CFTR-c.3874-4522;Pool=2
chr7	117292779	117292993	CFTR_24.110483	0	+	.	GENE_ID=CFTR;Pool=1
chr7	117304718	117304939	CFTR_25.165802	0	+	.	GENE_ID=CFTR;Pool=2
chr7	117305481	117305692	CFTR_26.36162	0	+	.	GENE_ID=CFTR;Pool=1
chr7	117306956	117307183	CFTR_27.1.252376	0	+	.	GENE_ID=CFTR;Pool=2
chr7	117307016	117307242	CFTR_27.1.390545	0	+	.	GENE_ID=CFTR;Pool=1
chr7	117307217	117307446	CFTR_27.1.603193	0	+	.	GENE_ID=CFTR;Pool=2
chr7	117307285	117307499	CFTR_27.1.563297	0	+	.	GENE_ID=CFTR;Pool=1
chr7	117307486	117307717	CFTR_27.1.651094	0	+	.	GENE_ID=CFTR;Pool=2
chr7	117307548	117307764	CFTR_27.1.85887	0	+	.	GENE_ID=CFTR;Pool=1
chr7	117307755	117307938	CFTR_27.2.143239	0	+	.	GENE_ID=CFTR;Pool=2
chr7	117307808	117307990	CFTR_27.2.3381	0	+	.	GENE_ID=CFTR;Pool=1
chr7	117307973	117308192	CFTR_27.2.56853	0	+	.	GENE_ID=CFTR;Pool=2
chr7	117308034	117308239	CFTR_27.2.370816	0	+	.	GENE_ID=CFTR,CFTR-1043;Pool=1
chr7	117308237	117308466	CFTR_27.2.263244	0	+	.	GENE_ID=CFTR;Pool=2
chr7	117308444	117308634	CFTR_27.2.116396	0	+	.	GENE_ID=CFTR;Pool=1
chr7	117308498	117308726	CFTR_27.2.266216	0	+	.	GENE_ID=CFTR;Pool=2
chr7	119564174	119564293	108_SP_88.6106	0	+	.	GENE_ID=rs10254361;Pool=1
chr7	136375844	136376014	108_SP_89.35731	0	+	.	GENE_ID=rs10954541;Pool=2
chr8	11256770	11256942	108_SP_90.122334	0	+	.	GENE_ID=rs6999270;Pool=1
chr8	11258422	11258592	108_SP_91.31056	0	+	.	GENE_ID=rs4841527;Pool=2
chr8	12727916	12728087	108_SP_92.156789	0	+	.	GENE_ID=rs2948376;Pool=1
chr8	19266663	19266832	108_SP_93.12365	0	+	.	GENE_ID=rs3802329;Pool=2
chr8	35304261	35304434	108_SP_94.93756	0	+	.	GENE_ID=rs10104759;Pool=1
chr8	95659604	95659777	108_SP_95.167461	0	+	.	GENE_ID=rs7004872;Pool=2
chr8	101349572	101349743	108_SP_96.147910	0	+	.	GENE_ID=rs7816786;Pool=1
chr8	120873194	120873363	108_SP_97.160228	0	+	.	GENE_ID=rs7843326;Pool=2
chr8	134902607	134902687	108_SP_98.7154	0	+	.	GENE_ID=rs4897728;Pool=1
chr8	136868291	136868460	108_SP_99.66911	0	+	.	GENE_ID=rs4339682;Pool=2
chr8	139086536	139086665	108_SP_100.28174	0	+	.	GENE_ID=rs7460299;Pool=1
chr9	344452	344626	108_SP_101.24200	0	+	.	GENE_ID=rs12347078;Pool=1
chr9	20171554	20171673	108_SP_102.52006	0	+	.	GENE_ID=rs11562206;Pool=2
chr9	80350939	80351109	108_SP_103.145145	0	+	.	GENE_ID=rs2839899;Pool=1
chr9	85168651	85168803	108_SP_104.167284	0	+	.	GENE_ID=rs9314709;Pool=2
chr9	88691903	88692076	108_SP_105.163126	0	+	.	GENE_ID=rs4333693;Pool=1
chr9	92342682	92342841	108_SP_106.25693	0	+	.	GENE_ID=rs11265889;Pool=2
chr9	95918626	95918779	108_SP_107.41217	0	+	.	GENE_ID=rs10992658;Pool=1
chr9	125737478	125737652	108_SP_108.95865	0	+	.	GENE_ID=rs618746;Pool=2
chr10	6237148	6237313	108_SP_5.90422	0	+	.	GENE_ID=rs11257188;Pool=1
chr10	75131418	75131554	108_SP_6.94255	0	+	.	GENE_ID=rs7090105;Pool=2
chr10	94893351	94893515	108_SP_7.14702	0	+	.	GENE_ID=rs6583859;Pool=1
chr10	94920140	94920314	108_SP_8.49264	0	+	.	GENE_ID=rs11187300;Pool=2
chr10	94973916	94974089	108_SP_9.30117	0	+	.	GENE_ID=rs10882183;Pool=1
chr10	94976814	94976991	108_SP_10.627	0	+	.	GENE_ID=rs4918924;Pool=2
chr10	95018306	95018472	108_SP_11.84073	0	+	.	GENE_ID=rs7091054;Pool=1
chr10	118176645	118176815	108_SP_12.23725	0	+	.	GENE_ID=rs10749212;Pool=2
chr10	119821252	119821423	108_SP_13.29314	0	+	.	GENE_ID=rs853577;Pool=1
chr10	119971317	119971436	108_SP_14.24774	0	+	.	GENE_ID=rs703426;Pool=2
chr11	5246576	5246798	HBB-c.444140_1.54863	0	+	.	GENE_ID=HBB,HBB-c.444+140;Pool=1
chr11	5246790	5247010	HBB_i2_1.17973	0	+	.	GENE_ID=HBB,HBB_i2,HBB-c.444+140;Pool=2
chr11	5246999	5247172	HBB_i2_1.3948	0	+	.	GENE_ID=HBB_i2,HBB-c.444+140;Pool=1
chr11	5247160	5247344	HBB_i2_1.19621	0	+	.	GENE_ID=HBB_i2;Pool=2
chr11	5247340	5247468	HBB_i2_1.1476	0	+	.	GENE_ID=HBB_i2;Pool=1
chr11	5247457	5247671	HBB_i2_1.16642	0	+	.	GENE_ID=HBB_i2;Pool=2
chr11	5247659	5247823	HBB_i2_1.1855	0	+	.	GENE_ID=HBB,HBB_i2;Pool=1
chr11	5247805	5248034	HBB_2.123692	0	+	.	GENE_ID=HBB_i1,HBB,HBB_i2;Pool=2
chr11	5247972	5248115	HBB-c.1-273_1.85492	0	+	.	GENE_ID=HBB_i1,HBB,HBB-c.1-273;Pool=1
chr11	5248103	5248298	HBB-c.1-273_1.556	0	+	.	GENE_ID=HBB,HBB_i1,HBB-c.1-273;Pool=2
chr11	5248285	5248509	HBB-c.1-273_1.125696	0	+	.	GENE_ID=HBB,HBB-c.1-273;Pool=1
chr11	5248500	5248679	HBB-c.1-273_1.52524	0	+	.	GENE_ID=HBB-c.1-273;Pool=2
chr11	19696377	19696550	108_SP_15.152460	0	+	.	GENE_ID=rs10741789;Pool=1
chr11	25134770	25134889	108_SP_16.7783	0	+	.	GENE_ID=rs7129598;Pool=2
chr11	61077570	61077742	108_SP_17.114984	0	+	.	GENE_ID=rs11822158;Pool=1
chr11	117102584	117102721	108_SP_18.32972	0	+	.	GENE_ID=rs2252145;Pool=2
chr11	120107300	120107470	108_SP_19.35693	0	+	.	GENE_ID=rs882856;Pool=1
chr12	10251006	10251174	108_SP_20.102889	0	+	.	GENE_ID=rs6488255;Pool=1
chr12	52348993	52349172	108_SP_21.115957	0	+	.	GENE_ID=rs11612312;Pool=2
chr12	85831122	85831290	108_SP_22.98142	0	+	.	GENE_ID=rs1533223;Pool=1
chr12	85833017	85833185	108_SP_23.161212	0	+	.	GENE_ID=rs1849384;Pool=2
chr12	103232095	103232310	PAH_1.138129	0	+	.	GENE_ID=PAH;Pool=1
chr12	103232221	103232418	PAH_1.418792	0	+	.	GENE_ID=PAH;Pool=2
chr12	103232354	103232566	PAH_1.433156	0	+	.	GENE_ID=PAH;Pool=1
chr12	103232471	103232635	PAH_1.301883	0	+	.	GENE_ID=PAH;Pool=2
chr12	103232622	103232816	PAH_ex15150_1.24369	0	+	.	GENE_ID=PAH_ex15+150,PAH;Pool=1
chr12	103232789	103233010	PAH_1.435445	0	+	.	GENE_ID=PAH_ex15+150,PAH;Pool=2
chr12	103232999	103233132	PAH_ex15150_1.14111	0	+	.	GENE_ID=PAH_ex15+150,PAH;Pool=1
chr12	103234151	103234379	PAH_2.217234	0	+	.	GENE_ID=PAH;Pool=2
chr12	103237347	103237565	PAH_3.168980	0	+	.	GENE_ID=PAH;Pool=1
chr12	103238000	103238224	PAH_4.135492	0	+	.	GENE_ID=PAH;Pool=2
chr12	103240569	103240789	PAH_5.5700	0	+	.	GENE_ID=PAH;Pool=1
chr12	103245367	103245594	PAH_6.238469	0	+	.	GENE_ID=PAH;Pool=2
chr12	103246560	103246786	PAH_7.147316	0	+	.	GENE_ID=PAH;Pool=1
chr12	103248898	103249116	PAH_8.163589	0	+	.	GENE_ID=PAH;Pool=2
chr12	103260303	103260530	PAH_9.97526	0	+	.	GENE_ID=PAH;Pool=1
chr12	103271161	103271355	PAH_10.6811	0	+	.	GENE_ID=PAH;Pool=2
chr12	103288493	103288717	PAH_11.123034	0	+	.	GENE_ID=PAH;Pool=1
chr12	103306506	103306729	PAH_12.90929	0	+	.	GENE_ID=PAH;Pool=2
chr12	103310704	103310922	PAH_c.1-81_1.3201	0	+	.	GENE_ID=PAH,PAH_c.1-81;Pool=1
chr12	103310806	103311041	PAH_13.394227	0	+	.	GENE_ID=PAH,PAH_c.1-81;Pool=2
chr12	103311033	103311253	PAH_13.227715	0	+	.	GENE_ID=PAH;Pool=1
chr12	103311204	103311442	PAH_13.99099	0	+	.	GENE_ID=PAH;Pool=2
chr12	117234425	117234596	108_SP_24.104334	0	+	.	GENE_ID=rs7314211;Pool=1
chr12	121706479	121706643	108_SP_25.50541	0	+	.	GENE_ID=rs1718120;Pool=2
chr12	125521922	125522048	108_SP_26.53237	0	+	.	GENE_ID=rs11058012;Pool=1
chr12	127012838	127013013	108_SP_27.61413	0	+	.	GENE_ID=rs7956341;Pool=2
chr13	41760881	41761013	108_SP_28.67077	0	+	.	GENE_ID=rs11620231;Pool=1
chr14	43228222	43228392	108_SP_29.12819	0	+	.	GENE_ID=rs997299;Pool=1
chr14	69574900	69575069	108_SP_30.122662	0	+	.	GENE_ID=rs2056153;Pool=2
chr14	81421809	81422009	TSHR_c.1-38_1.27167	0	+	.	GENE_ID=TSHR_c.1-38,TSHR;Pool=1
chr14	81421989	81422199	TSHR_1.23659	0	+	.	GENE_ID=TSHR_c.1-38,TSHR;Pool=2
chr14	81528398	81528616	TSHR_2.64800	0	+	.	GENE_ID=TSHR;Pool=1
chr14	81534497	81534724	TSHR_3.69369	0	+	.	GENE_ID=TSHR;Pool=2
chr14	81554208	81554432	TSHR_4.151628	0	+	.	GENE_ID=TSHR;Pool=1
chr14	81557319	81557543	TSHR_5.229760	0	+	.	GENE_ID=TSHR;Pool=2
chr14	81558741	81558965	TSHR_6.141228	0	+	.	GENE_ID=TSHR;Pool=1
chr14	81562929	81563154	TSHR_7.133931	0	+	.	GENE_ID=TSHR;Pool=2
chr14	81574635	81574850	TSHR_8.100083	0	+	.	GENE_ID=TSHR;Pool=1
chr14	81574728	81574948	TSHR_8.111476	0	+	.	GENE_ID=TSHR;Pool=2
chr14	81574898	81575064	TSHR_9.261619	0	+	.	GENE_ID=TSHR;Pool=1
chr14	81574993	81575217	TSHR_9.202931	0	+	.	GENE_ID=TSHR;Pool=2
chr14	81575094	81575325	TSHR_9.95628	0	+	.	GENE_ID=TSHR;Pool=1
chr14	81606014	81606236	TSHR_10.243032	0	+	.	GENE_ID=TSHR;Pool=2
chr14	81609269	81609484	TSHR_11.1.160535	0	+	.	GENE_ID=TSHR;Pool=1
chr14	81609298	81609523	TSHR_11.1.389783	0	+	.	GENE_ID=TSHR;Pool=2
chr14	81609518	81609748	TSHR_11.1.644942	0	+	.	GENE_ID=TSHR;Pool=1
chr14	81609569	81609779	TSHR_11.1.640704	0	+	.	GENE_ID=TSHR;Pool=2
chr14	81609778	81610005	TSHR_11.1.474100	0	+	.	GENE_ID=TSHR;Pool=1
chr14	81609844	81610067	TSHR_11.1.598723	0	+	.	GENE_ID=TSHR;Pool=2
chr14	81610034	81610268	TSHR_11.2.166326	0	+	.	GENE_ID=TSHR;Pool=1
chr14	81610110	81610335	TSHR_11.2.525032	0	+	.	GENE_ID=TSHR;Pool=2
chr14	81610299	81610514	TSHR_11.2.460100	0	+	.	GENE_ID=TSHR;Pool=1
chr14	81610502	81610681	TSHR_ex1044_1.62240	0	+	.	GENE_ID=TSHR_ex10+44,TSHR;Pool=2
chr14	81610680	81610883	TSHR_ex1044_1.46628	0	+	.	GENE_ID=TSHR_ex10+44,TSHR;Pool=1
chr14	81610860	81611081	TSHR_11.2.447963	0	+	.	GENE_ID=TSHR;Pool=2
chr14	81611002	81611221	TSHR_11.2.98388	0	+	.	GENE_ID=TSHR;Pool=1
chr14	81611126	81611343	TSHR_11.3.482918	0	+	.	GENE_ID=TSHR;Pool=2
chr14	81611269	81611473	TSHR_11.3.150454	0	+	.	GENE_ID=TSHR;Pool=1
chr14	81611386	81611566	TSHR_11.3.12639	0	+	.	GENE_ID=TSHR;Pool=2
chr14	81611504	81611685	TSHR_11.3.406139	0	+	.	GENE_ID=TSHR;Pool=1
chr14	81611621	81611801	TSHR_11.3.34103	0	+	.	GENE_ID=TSHR;Pool=2
chr14	81611717	81611938	TSHR_11.3.579346	0	+	.	GENE_ID=TSHR;Pool=1
chr14	81611912	81612134	TSHR_11.3.386010	0	+	.	GENE_ID=TSHR;Pool=2
chr14	81611977	81612199	TSHR_11.3.104585	0	+	.	GENE_ID=TSHR;Pool=1
chr14	81612175	81612353	TSHR_11.4.240131	0	+	.	GENE_ID=TSHR;Pool=2
chr14	81612242	81612449	TSHR_11.4.313201	0	+	.	GENE_ID=TSHR;Pool=1
chr14	81612428	81612647	TSHR_11.4.2833	0	+	.	GENE_ID=TSHR;Pool=2
chr14	81612488	81612684	TSHR_11.4.291277	0	+	.	GENE_ID=TSHR;Pool=1
chr14	98246034	98246203	108_SP_31.84036	0	+	.	GENE_ID=rs1350922;Pool=2
chr15	42528623	42528797	108_SP_32.113858	0	+	.	GENE_ID=rs1679012;Pool=1
chr15	45074495	45074607	108_SP_33.88232	0	+	.	GENE_ID=rs2462043;Pool=2
chr15	45152354	45152529	108_SP_34.88162	0	+	.	GENE_ID=rs735480;Pool=1
chr15	48384792	48384956	108_SP_35.29438	0	+	.	GENE_ID=rs2250072;Pool=2
chr15	48389820	48389990	108_SP_36.129337	0	+	.	GENE_ID=rs12440301;Pool=1
chr15	48396780	48396906	108_SP_37.6578	0	+	.	GENE_ID=rs1559857;Pool=2
chr15	52649067	52649177	108_SP_38.23560	0	+	.	GENE_ID=rs8028033;Pool=1
chr15	64436336	64436461	108_SP_39.26469	0	+	.	GENE_ID=rs12591947;Pool=2
chr15	64524913	64525084	108_SP_40.45567	0	+	.	GENE_ID=rs8033972;Pool=1
chr15	94073751	94073881	108_SP_41.71334	0	+	.	GENE_ID=rs10520735;Pool=2
chr16	824087	824211	108_SP_42.51675	0	+	.	GENE_ID=rs9927150;Pool=1
chr16	9227321	9227460	108_SP_43.147631	0	+	.	GENE_ID=rs8058645;Pool=2
chr16	22140990	22141156	108_SP_44.115095	0	+	.	GENE_ID=rs6497573;Pool=1
chr16	79906313	79906482	108_SP_45.102807	0	+	.	GENE_ID=rs12102675;Pool=2
chr17	64016168	64016342	108_SP_46.51825	0	+	.	GENE_ID=rs2111413;Pool=1
chr18	7232809	7232982	108_SP_47.50106	0	+	.	GENE_ID=rs11664524;Pool=1
chr18	29956363	29956498	108_SP_48.9720	0	+	.	GENE_ID=rs1037753;Pool=2
chr18	38146334	38146495	108_SP_49.90041	0	+	.	GENE_ID=rs7506165;Pool=1
chr18	40953067	40953167	108_SP_50.53307	0	+	.	GENE_ID=rs610325;Pool=2
chr19	57569805	57569973	108_SP_51.54235	0	+	.	GENE_ID=rs12609898;Pool=1
chr20	31144750	31144922	108_SP_62.175664	0	+	.	GENE_ID=rs6141319;Pool=1
chr20	55932455	55932612	108_SP_63.91647	0	+	.	GENE_ID=rs4811839;Pool=2
chr21	31528086	31528255	108_SP_64.37388	0	+	.	GENE_ID=rs2832643;Pool=1
chr22	43551036	43551209	108_SP_65.67343	0	+	.	GENE_ID=rs762960;Pool=1
